# Supplementary material
Source: MDPI journal article supplement (https://www.mdpi.com/1424-2818/3/4/611)
Supplement: s1 [file s1]

## Sheet: Sheet1
Supplement 1. Site history, disturbance and management for 14 natural areas in Marion County, Indiana, U.S.A.
	All sites have invasive species present.
Site	Year Protected	Historical Disturbance Level	Portion cleared for agriculture	Selectively logged and grazed	Portions mined for gravel	Landscaped estate	Private nature preserve	Off road vehicles	Army manuvers	Current/Recent Disturbance level	Trails	High volume of visitors	Deer browse	Mountain bikes	High tension utilitiy lines	Current Management Effort
ANP	1972	High	x		x					High	x	x				High
CSS	Estate 1923, under ecological management 1998	High				x				Low	x					Med.
ECNP	1962, state nature preserve 1991	Low		x			x			Low	x		x			High
ECNC	1962	Med.		x			x			Med.	x	x	x			Med.
FHSP	Army base 1903, state park 1995	Med.		x					x	Med.	x		x			Med.
JSP	City park 1971	Med.		x						Med.	x					High
MCC	1995	Med.	x	x						Low						Med.
MPMT	1990's	Med.	x	x						Med.	x	x				Low
MPNP	City park 1945, state nature preserve 1987	Low		x						Low	x					High
MUEL	Estate in 1914, college in 1936, ecol. man. 2000	High				x				Med.	x					High
SPNP	1962, state nature preserve 1987	Low		x			x			Low			x			High
SWWP	1961	Med.	x	x				x		Med.	x			x	x	High
TRSP	2000	High	x	x	x					High	x	x		x		Med.
WGP	1919	Low		x						Low			x			Med.
